# Supplementary material for: Genome-Wide Analysis of Group A Streptococci Reveals a Mutation That Modulates Global Phenotype and Disease Specificity
Source: PLOS journal article supplement (doi:10.1371/journal.ppat.0020005), 2006-01-19
Supplement: S1 (10.1371/journal.ppat.0020005.s001) [file journal.ppat.0020005.s001]

[Supplementary table]

**Table S1 Serotype M1 group A *Streptococcus* isolates studied.**

| **Strain** | **Disease or sourceA** | **YearB** | **IsolatedC** | **ProfileD** | ***covR/S* mutationE** |
| --- | --- | --- | --- | --- | --- |
| 21PL1 | MGAS2221 MPD | N/A | Lesion.1 | ITP | Δ *covS* n.t. 1,250 |
| 21PL3 | MGAS2221 MPD | N/A | Lesion.1 | ITP | Δ *covS* n.t. 1,250 |
| 24SS1 | MGAS2221 MPD | N/A | Spleen.4 | ITP | Δ *covS* n.t. 1,250 |
| 24SS2 | MGAS2221 MPD | N/A | Spleen.4 | ITP | Δ *covS* n.t. 1,250 |
| 24SS3 | MGAS2221 MPD | N/A | Spleen.4 | ITP | Δ *covS* n.t. 1,250 |
| 24SL2 | MGAS2221 MPD | N/A | Spleen.4 | ITP | Δ *covS* n.t. 1,250 |
| 26PL1 | MGAS2221 MPD | N/A | Lesion.6 | ITP | 7bp insert in *covS* |
| 26PL2 | MGAS2221 MPD | N/A | Lesion.6 | ITP | 7bp insert in *covS* |
| 26PL3 | MGAS2221 MPD | N/A | Lesion.6 | ITP | 7bp insert in *covS* |
| 26SL1 | MGAS2221 MPD | N/A | Spleen.6 | ITP | Δ *covR* n.t. 232-234 |
| 26SL2 | MGAS2221 MPD | N/A | Spleen.6 | ITP | Δ *covR* n.t. 232-234 |
| 26SL3 | MGAS2221 MPD | N/A | Spleen.6 | ITP | Δ *covR* n.t. 232-234 |
| 21PL2 | MGAS2221 MPD | N/A | Lesion.1 | ITP | R119H in *covR* |
| 24SL1 | MGAS2221 MPD | N/A | Spleen.4 | ITP | R119H in *covR* |
| 24SL3 | MGAS2221 MPD | N/A | Spleen.4 | ITP | R119H in *covR* |
| 21PS1 | MGAS2221 MPD | N/A | Lesion.1 | PTP | Wild-type |
| 21PS2 | MGAS2221 MPD | N/A | Lesion.1 | PTP | Wild-type |
| 21PS3 | MGAS2221 MPD | N/A | Lesion.1 | PTP | Wild-type |
| 26PS1 | MGAS2221 MPD | N/A | Lesion.6 | PTP | Wild-type |
| 26PS2 | MGAS2221 MPD | N/A | Lesion.6 | PTP | Wild-type |
| 26PS3 | MGAS2221 MPD | N/A | Lesion.6 | PTP | Wild-type |
| 521SL1 | MGAS5005 MPD | N/A | Spleen.11 | ITP | Δ *covS* n.t. 80 |
| 521SL2 | MGAS5005 MPD | N/A | Spleen.11 | ITP | Δ *covS* n.t. 80 |
| 521SL3 | MGAS5005 MPD | N/A | Spleen.11 | ITP | Δ *covS* n.t. 80 |
| 53SL1 | MGAS5005 MPD | N/A | Spleen.9 | ITP | Δ *covS* n.t. 80 |
| 53SL2 | MGAS5005 MPD | N/A | Spleen.9 | ITP | Δ *covS* n.t. 80 |
| 53PL1 | MGAS5005 MPD | N/A | Lesion.9 | ITP | Δ *covS* n.t. 80 |
| MGAS5005 | Cerebral spinal fluid | 1996 | Ontario | ITP | Δ *covS* n.t. 80 |
| MGAS2217 | Invasive | 1990s | New Zealand | ITP | 1bp insert in *covS* |
| MGAS6184 | Invasive | 1997-8 | Texas | ITP | A397V in *covS* |
| MGAS294 | Invasive | 1980s | Washington | ITP | V286F in *covS* |
| MGAS2221 | Scarlet fever | 1988 | Australia | PTP | Wild-type |
| MGAS5087 | Lower resp. tract | 1993 | Ontario | PTP | Wild-type |
| MGAS1284 | Unknown | 1990 | Denmark | PTP | Wild-type |
| MGAS5322 | Throat | 1989 | E Finland | PTP | Wild-type |
| MGAS1508 | Scarlet fever | 1985 | Czechoslovakia | PTP | Wild-type |
| MGAS1264 | Sepsis | 1973 | Denmark | PTP | Wild-type |
| MGAS1922 | Sepsis | ? | Netherlands | PTP | Wild-type |
| MGAS5932 | STSS | 1997 | Ontario | PTP | Wild-type |
| MGAS313 | STSS | 1980s | Wyoming | PTP | Wild-type |
| MGAS5456 | Throat | 1994 | S Finland | PTP | Wild-type |
| MGAS9127 | Invasive | 1990s | Alberta | PTP | Wild-type |

A MPD, mouse-passaged derivative; STSS, streptococcal toxic shock syndrome

B N/A, not applicable

C Site and mouse I.D. number from which the strain was isolated (MPDs), or location (Clinical)

D ITP, invasive transcriptome profile; PTP, pharyngeal transcriptome profile

En.t., nucleotide; Δ, deletion
